# Supplementary material
Source: publisher site journal article supplement (https://www.spandidos-publications.com/4420/downloadSupplementary)

Figure S1. Exosomes derived from STS-treated COPD mice increase the viability of 16HBE cells. 16HBE cells were treated with exosomes purified from COPD mice (COPD-exo) or STS-treated COPD mice (COPD+STS-exo) for 48 h, and cell viability was determined using CCK-8 assay. Cells treated with equal volume of PBS served as the control group (n=5). \*P<0.05. COPD, chronic obstructive pulmonary disease; STS, sodium tanshinone IIA sulfonate; OD, optical density.

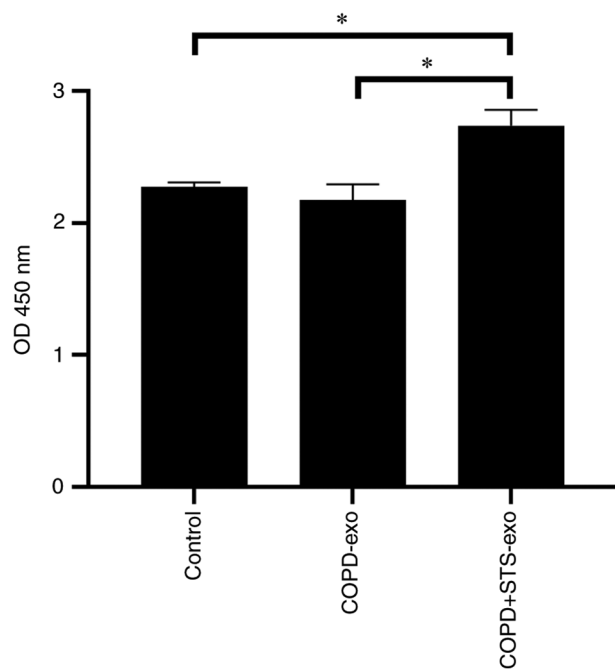

Supplement: Supplementary file 1 [file downloadSupplementary]
